# Supplementary material for: Hypoxia-induced Slug SUMOylation enhances lung cancer metastasis
Source: PubMed Central journal article supplement (PMC6322271; doi:10.1186/s13046-018-0996-8), 2019-01-06

Hung *et al.* Figure S13

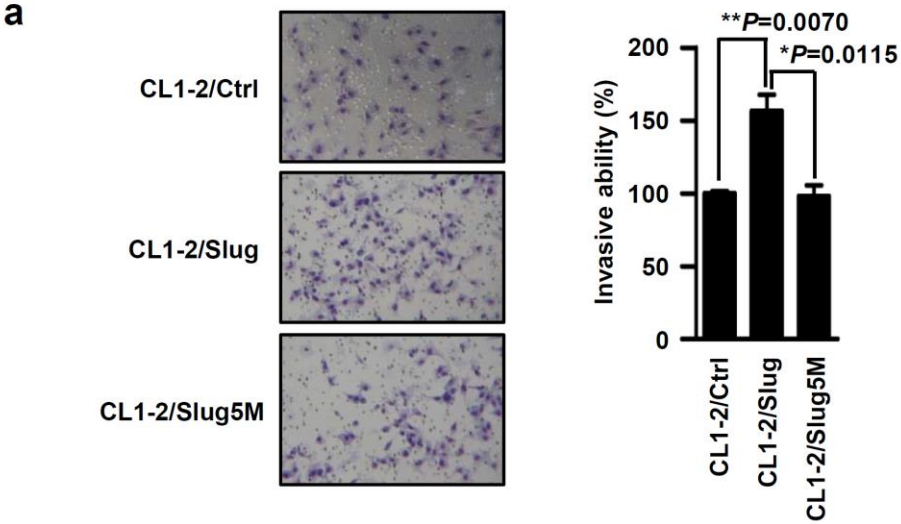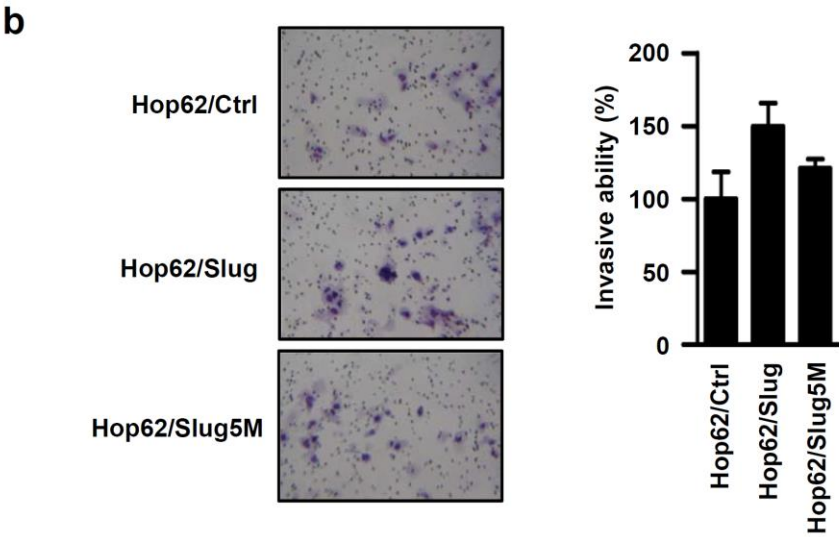

Supplement: 13046_2018_996_MOESM13_ESM.pdf [file 13046_2018_996_MOESM13_ESM.pdf]
