# Supplementary material for: Hypoxia-induced Slug SUMOylation enhances lung cancer metastasis
Source: Springer Nature journal article supplement (doi:10.1186/s13046-018-0996-8), 2019-01-06

Hung *et al.* Figure S11

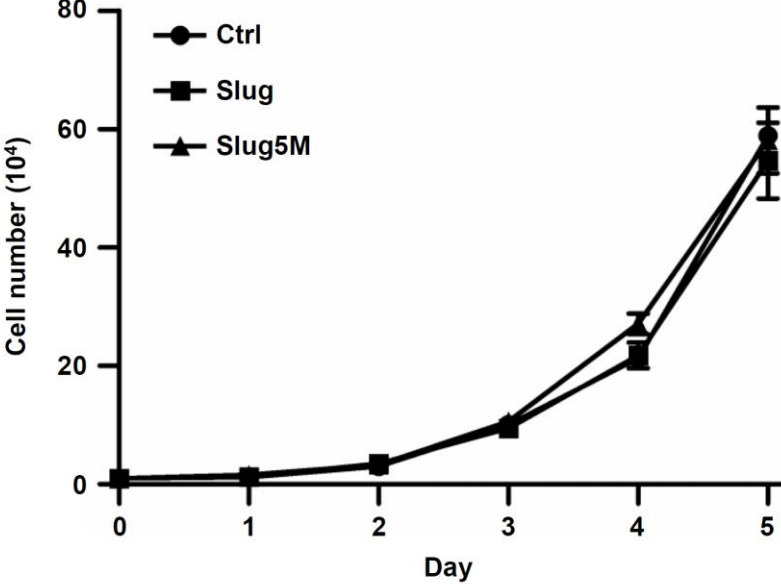

Supplement: MOESM11 [file 16379774]
